# Supplementary material for: Synthesis and first complexes of C4/5 P-bifunctional imidazole-2-thiones
Source: Royal Society of Chemistry journal article supplement (doi:10.1039/c3dt51557e), 2013-01-01
Supplement: c3dt51557e.pdf [file c3dt51557e.pdf]

## Synthesis and first complexes of C<sup>4/5</sup> P-bifunctional imidazole-2-thiones

Paresh Kumar Majhi, Susanne Sauerbrey, Alexander Leiendecker Gregor Schnakenburg, Anthony J. Arduengo III, \* and Rainer Streubel\*

### Supporting information

Table S1. Crystallographic Data for Compounds **5c** and **7d**

| Compound                                 | <b>5c</b>          | <b>7d</b>          |
|------------------------------------------|--------------------|--------------------|
| Crystal system                           | Monoclinic         | Triclinic          |
| Space group                              | P 21/n             | P -1               |
| a (Å)                                    | 9.3636(8)          | 11.6761(9)         |
| b (Å)                                    | 34.410(3)          | 11.7150(11)        |
| c (Å)                                    | 9.3807(8)          | 12.7206(13)        |
| $\beta$ (°)                              | 117.124(2)         | 104.629(3)         |
| V (Å <sup>3</sup> )                      | 2690.1(4)          | 1442.7(2)          |
| Z                                        | 4                  | 2                  |
| $d_c$ (g cm <sup>-3</sup> )              | 1.335              | 1.313              |
| $\mu$ (mm <sup>-1</sup> )                | 0.267              | 0.256              |
| F(000)                                   | 1136               | 600                |
| Crystal size(mm)                         | 0.30 x 0.30 x 0.24 | 0.08 x 0.04 x 0.03 |
| Reflections collected                    | 27883              | 12940              |
| Reflections unique                       | 6484               | 5525               |
| Mo K $\alpha$ radiation ( $\lambda$ , Å) | 0.71073            | 0.71073            |
| Final R indices(R1)                      | 0.0377             | 0.0436             |
| wR2                                      | 0.0933             | 0.0961             |
| R indices (all data) R1                  | 0.0470             | 0.0762             |
| wR2                                      | 0.0978             | 0.1079             |
| GOF                                      | 1.067              | 1.037              |
| Parameters                               | 337                | 354                |

Table S2. Crystallographic Data for Compounds **8b**, **9a** and **13**

| Compound                             | <b>8b</b>          | <b>9a</b>          | <b>13</b>          |
|--------------------------------------|--------------------|--------------------|--------------------|
| Crystal system                       | orthorhombic       | Monoclinic         | Monoclinic         |
| Space group                          | Pna2 <sub>1</sub>  | C 2/c              | P 21/c             |
| a (Å)                                | 12.4616(3)         | 15.6164(16)        | 11.1582(2)         |
| b (Å)                                | 20.6622(6)         | 12.2568(12)        | 26.3418(5)         |
| c (Å)                                | 12.8212            | 14.9796(14)        | 17.2063            |
| β (°)                                | -                  | 112.742(3)         | 116.5660           |
| V (Å <sup>3</sup> )                  | 3301.26(16)        | 2644.3(5)          | 4523.44(15)        |
| Z                                    | 4                  | 4                  | 4                  |
| d <sub>c</sub> (g·cm <sup>-3</sup> ) | 1.345              | 1.408              | 1.505              |
| μ (mm <sup>-1</sup> )                | 0.294              | 0.424              | 0.876              |
| F(000)                               | 1392               | 1168               | 2096               |
| Crystal size(mm)                     | 0.32 x 0.32 x 0.16 | 0.60 x 0.30 x 0.10 | 0.09 x 0.07 x 0.02 |
| Reflections collected                | 17943              | 17773              | 58084              |
| Reflections unique                   | 7777               | 3185               | 10910              |
| Mo Kα radiation (λ, Å)               | 0.71073            | 0.71073            | 0.71073            |
| Final R indices(R1)                  | 0.0377             | 0.0286             | 0.0400             |
| wR2                                  | 0.1012             | 0.0741             | 0.0973             |
| R indices (all data) R1              | 0.0459             | 0.0327             | 0.0617             |
| wR2                                  | 0.1046             | 0.0767             | 0.1052             |
| GOF                                  | 1.038              | 1.047              | 1.048              |
| Parameters                           | 416                | 165                | 499                |
